# Supplementary material
Source: MDPI journal article supplement (https://www.mdpi.com/2073-4395/7/4/70)
Supplement: s1 [file s1]

**Supplementary Table S1.** Nitrogen concentrations in rice (cv. IR64) grain and aboveground biomass during grain filling under high yielding field conditions. The mean of three replicates is presented followed by the SEM in parentheses. Note that at anthesis the grain comprised only of the husk tissue.

| <b>Days after<br/>anthesis</b> | <b><u>Nitrogen concentration (g kg<sup>-1</sup>)</u></b> |                   |                    |
|--------------------------------|----------------------------------------------------------|-------------------|--------------------|
|                                | <b>Grain</b>                                             | <b>Vegetative</b> | <b>Whole plant</b> |
| 0                              | 13.2 (1.6)                                               | 17.9 (1.3)        | 17.2 (1.4)         |
| 5                              | 14.4 (1.2)                                               | 18.8 (0.6)        | 18.0 (0.3)         |
| 9                              | 14.8 (1.8)                                               | 18.2 (1.7)        | 17.2 (1.6)         |
| 13                             | 14.1 (1.4)                                               | 14.7 (1.4)        | 14.5 (1.3)         |
| 17.5                           | 12.4 (0.4)                                               | 12.0 (1.1)        | 12.2 (0.7)         |
| 22.5                           | 12.5 (0.2)                                               | 10.5 (0.7)        | 11.6 (0.2)         |
| 28                             | 11.7 (1.0)                                               | 8.4 (0.7)         | 10.4 (0.8)         |
